# Supplementary figures and images for: Fabrication of a Fish-Bone-Inspired Inorganic–Organic Composite Membrane
Source: MDPI journal article supplement (doi:10.3390/polym15204190), 2023-10-23

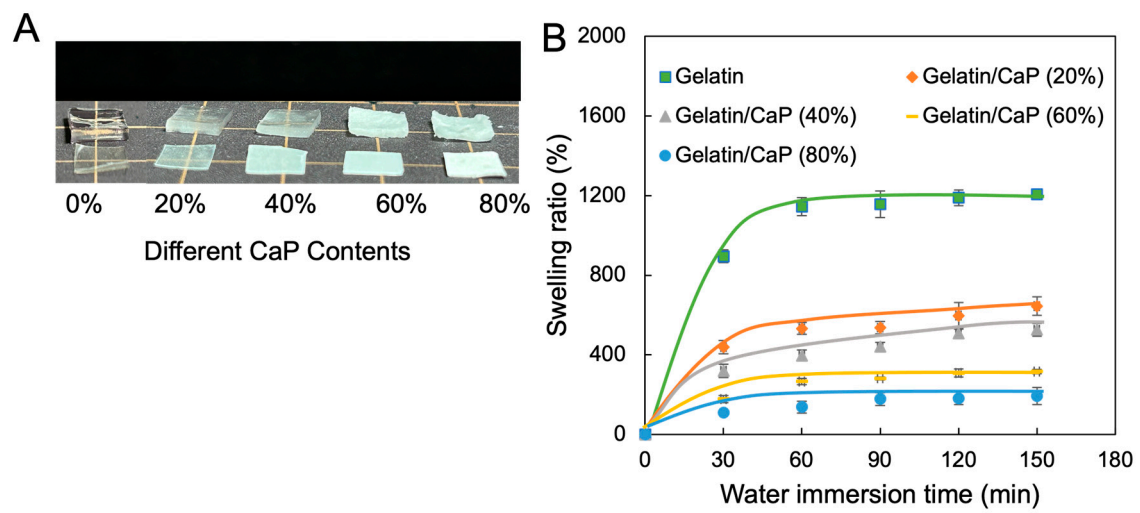

**Figure S1.** Swelling ratio of CaP–gelatin composite membrane.

Supplement: s1 [file s1]
